# Supplementary material
Source: PubMed Central journal article supplement (PMC9159659)

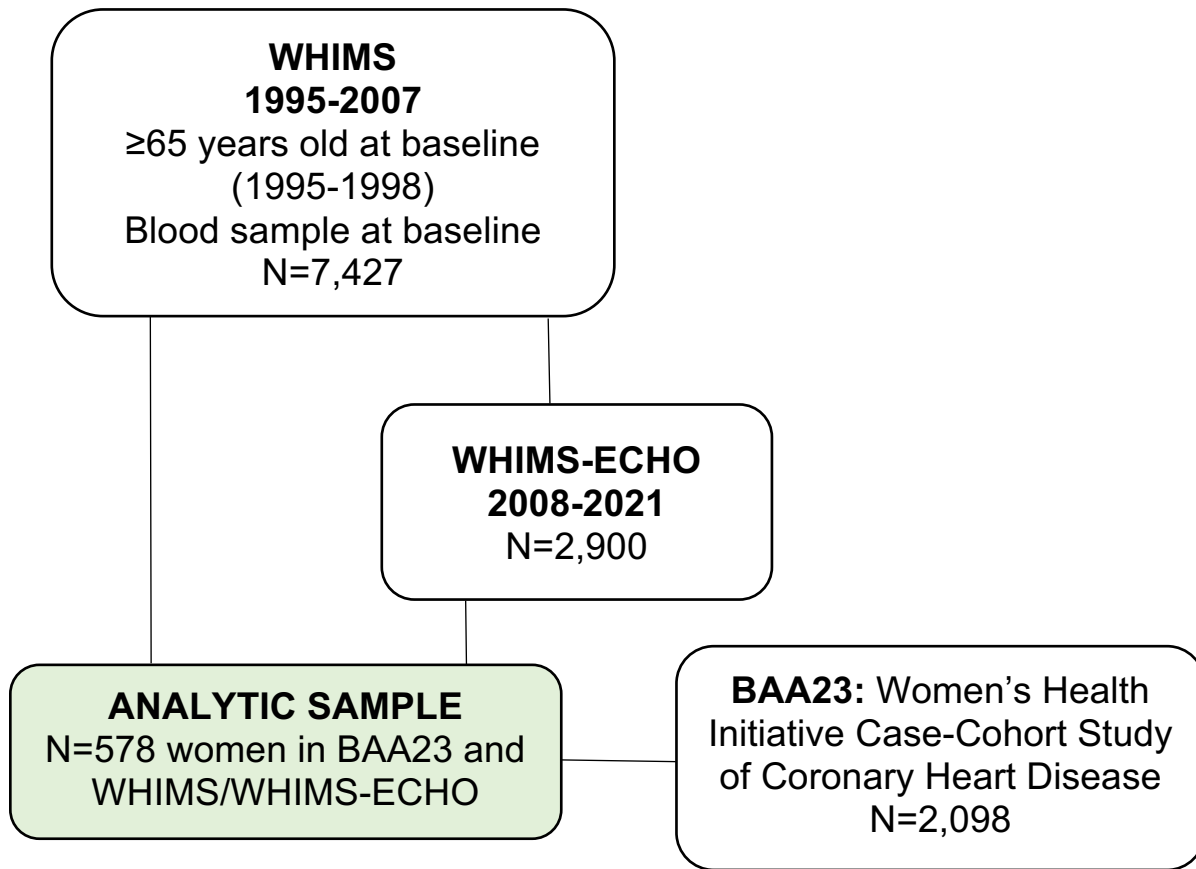

**Supplementary Figure 1.** Derivation of Analytic Sample

Supplement: glab245_suppl_supplementary_materials.pdf [file glab245_suppl_supplementary_materials.pdf]
